# Supplementary material
Source: Springer Nature journal article supplement (https://www.springermedizin.de/resource/supplementary/12967_2008_259_MOESM6_ESM.pdf/9576048)
Supplement: MOESM6 [file 9576048]

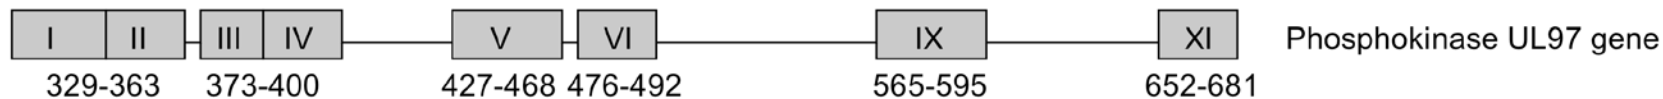

| Patient | pp65-CD4 | Viral load | UL97 variants          | 594                                      | 603                                      | IC50      | wt increase |
|---------|----------|------------|------------------------|------------------------------------------|------------------------------------------|-----------|-------------|
|         |          |            | wt (AD169)             | A C R A L E N G K L T H C S D A C        |                                          |           | 1x          |
| 1: D(+) | R(-)     | 0.00%      | 9x10 <sup>4</sup> c/ml | G598S                                    | A C R A L E N <u>S</u> K L T H C S D A C | n.a.      |             |
| 2: D(+) | R(+)     | 0.00%      | 3x10 <sup>6</sup> c/ml | A594V                                    | A C R <u>V</u> L E N G K L T H C S D A C | 5.9 uM    | 7x(1)       |
|         |          |            | L595S                  | A C R A <u>S</u> E N S K L T H C S D A C | 6.4 uM                                   | 11.6x (1) |             |
|         |          |            | del601-603*            | A C R A L E N G K L . . . S D A C        | n.a.                                     |           |             |
|         |          |            | del599-603, S604T*     | A C R A L E N G . . . . <u>T</u> D A C   | n.a.                                     |           |             |
|         |          |            | del595-603             | A C R A . . . . . S D A C                | 24.4 uM                                  | 8.4x (2)  |             |
|         |          |            | del593-603*            | A C . . . . . S D A C                    | n.a.                                     |           |             |
|         |          |            |                        | 654                                      | 663                                      |           |             |
|         |          |            | wt (AD169)             | R F Y H E C S Q T M L H E Y V R K        |                                          |           |             |
| 3: D(+) | R(+)     | 0.00%      | 3x10 <sup>4</sup> c/ml | T659S                                    | R F Y H E C S Q <u>S</u> M L H E Y V R K | n.a.      |             |
| 4: D(+) | R(+)     | 0.02%      | 1x10 <sup>4</sup> c/ml | unknown                                  |                                          |           |             |
